# Supplementary material
Source: HighWire-hosted journal article supplement (https://jnm.snmjournals.org/highwire/filestream/103399/field_highwire_adjunct_files/0/258392_Supplemental_Data.pdf)
Supplement: 258392_Supplemental_Data.pdf [file 258392_Supplemental_Data.pdf]

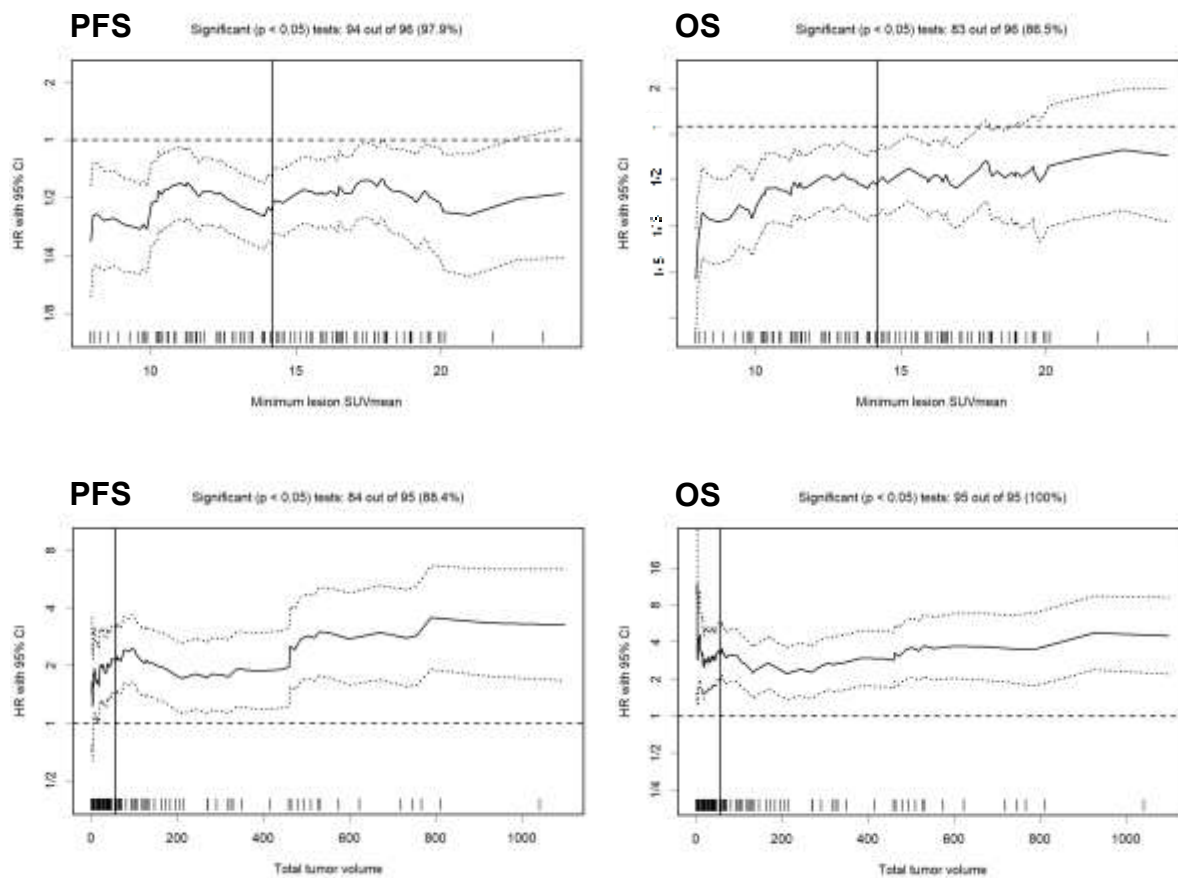

**SUPPLEMENTAL FIGURE 1.** HR (solid line) and corresponding 95% CI (dotted lines) at every possible cutoff of minimum  $SUV_{mean}$  and total tumor volume in regards to PFS and OS. Distribution of observations is shown along the x-axis. Vertical solid line is placed at median values. Horizontal dotted line at  $HR = 1$ . For total tumor volume and minimum  $SUV_{mean}$ , the plots show that the median is a reasonable cutoff. HR: hazard ratio. CI: confidence interval. PFS: progression-free survival. OS: overall survival. SUV: standardized uptake value.

**SUPPLEMENTAL FIGURE 2.** Kaplan-Meier plots of progression-free survival and overall survival for patients grouped by WHO classification.

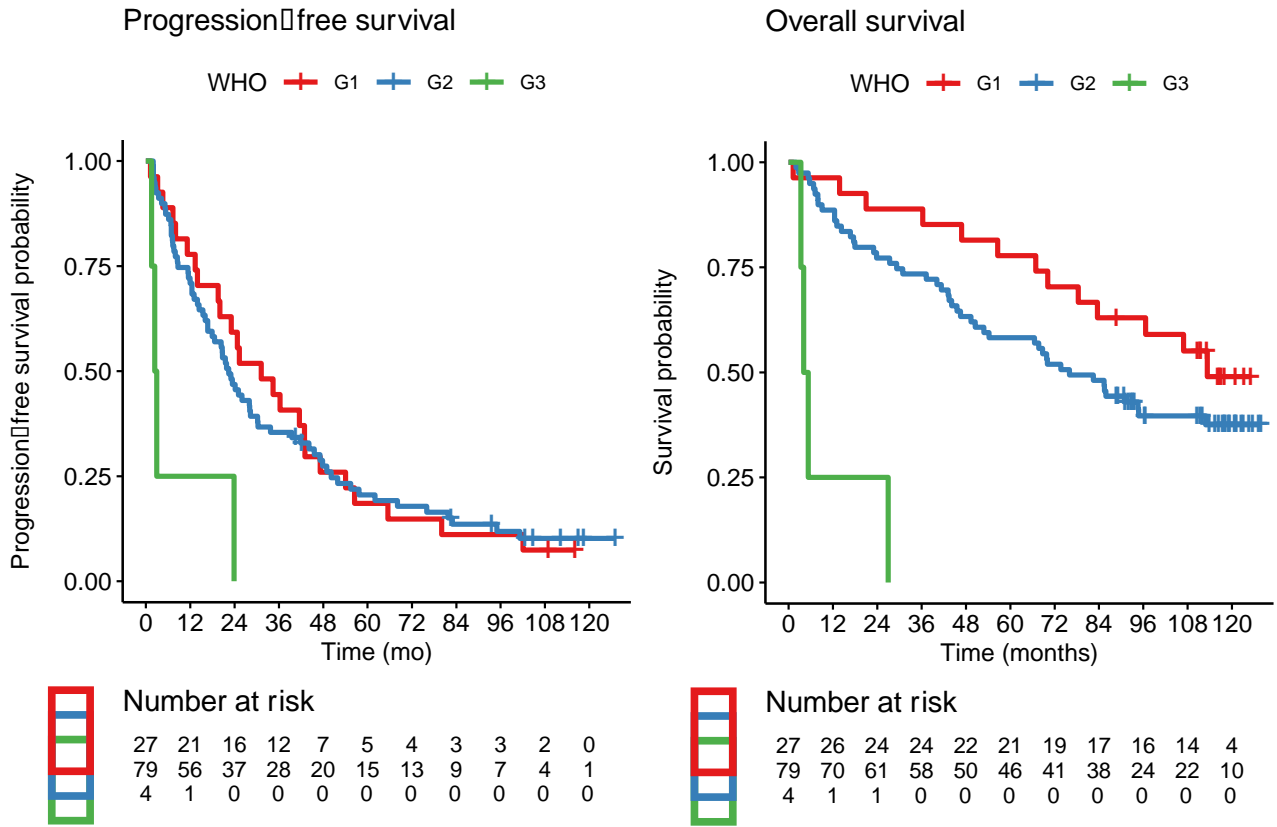

**SUPPLEMENTAL TABLE 1.** Univariate Cox Regression Analyses for Progression-Free Survival and Overall Survival.

| <b>Progression-free survival</b> |                        |                    |          |                 |                    |          |
|----------------------------------|------------------------|--------------------|----------|-----------------|--------------------|----------|
|                                  | <i>Small intestine</i> |                    |          | <i>Pancreas</i> |                    |          |
| <b>Group</b>                     | <b>n</b>               | <b>HR (95% CI)</b> | <b>P</b> | <b>n</b>        | <b>HR (95% CI)</b> | <b>P</b> |
| VhSl                             | 20                     | Reference          | -        | 11              | Reference          | -        |
| VhSh                             | 10                     | 0.63 (0.28-1.42)   | 0.26     | 3               | 0.31 (0.08-1.19)   | 0.09     |
| VISl                             | 11                     | 1.2 (0.56-2.55)    | 0.63     | 0               | NA                 | -        |
| VISh                             | 25                     | 0.47 (0.24-0.90)   | 0.02     | 11              | 0.22 (0.08-0.61)   | <0.01    |
| <b>Overall survival</b>          |                        |                    |          |                 |                    |          |
|                                  | <i>Small intestine</i> |                    |          | <i>Pancreas</i> |                    |          |
| <b>Group</b>                     | <b>n</b>               | <b>HR (95% CI)</b> | <b>P</b> | <b>n</b>        | <b>HR (95% CI)</b> | <b>P</b> |
| VhSl                             | 20                     | Reference          | -        | 11              | Reference          | -        |
| VhSh                             | 10                     | 0.61 (0.23-1.60)   | 0.31     | 3               | 0.41 (0.09-1.89)   | 0.25     |
| VISl                             | 11                     | 0.48 (0.18-1.25)   | 0.13     | 0               | NA                 | -        |
| VISh                             | 25                     | 0.29 (0.12-0.68)   | <0.01    | 11              | 0.23 (0.08-0.69)   | <0.01    |

Patients with high total tumor volume and low minimum SUV<sub>mean</sub> are reference. HR = hazard ratio. CI = confidence interval. SUV = standardized uptake value. VhSl = high total tumor volume + low minimum SUV<sub>mean</sub>. VhSh = high total tumor volume + high minimum SUV<sub>mean</sub>. VISl = low total tumor volume + low minimum SUV<sub>mean</sub>. VISh = low total tumor volume + high minimum SUV<sub>mean</sub>.

**SUPPLEMENTAL TABLE 2.** Univariate Cox regression analyses for progression-free survival and overall survival. WHO Grade 1 as reference. N=110. HR: hazard ratio. CI: confidence interval

| <b>Progression-free survival</b> |                    |                |
|----------------------------------|--------------------|----------------|
| <b>Group</b>                     | <b>HR (95% CI)</b> | <b>p-value</b> |
| Grade 1 (n=27)                   | Reference          |                |
| Grade 2 (n=79)                   | 1.05 (0.66-1.65)   | 0.84           |
| Grade 3 (n=4)                    | 4.88 (1.66-14.32)  | <0.01          |
| <b>Overall survival</b>          |                    |                |
| <b>Group</b>                     | <b>HR (95% CI)</b> | <b>p-value</b> |
| Grade 1 (n=27)                   | Reference          |                |
| Grade 2 (n=79)                   | 1.60 (0.87-2.96)   | 0.13           |
| Grade 3 (n=4)                    | 18.08 (5.42-60.26) | <0.001         |
